# Supplementary material for: The effectiveness of motivational interviewing on the oral health of leukemic children and oral health care knowledge, attitude and practice of their mothers: a hospital-based intervention
Source: PubMed Central journal article supplement (PMC10207771; doi:10.1186/s12887-023-04078-y), 2023-05-24
Supplement: 12887_2023_4078_MOESM1_ESM.pdf [file 12887_2023_4078_MOESM1_ESM.pdf]

**Questionnaire about mother's oral-health knowledge, mother's practice about children, demographic data and child's clinical examination:**

**Knowledge questions:**

1.1. The first primary tooth erupts averagely at 6 months of age.

Yes  No  I do not know

1.2. Bacteria responsible for dental caries often transfer from mother to child.

Yes  No  I do not know

1.3. Fluoridated toothpastes should not be used for children under 3 years of age.

Yes  No  I do not know

1.4. White lines or spots are the first signs of caries in children.

Yes  No  I do not know

1.5. Tooth cleaning and tooth brushing should be started following the eruption of the first primary tooth.

Yes  No  I do not know

1.6. Fluoridated toothpastes prevent dental caries.

Yes  No  I do not know

1.7. Children should not use fluoride.

Yes  No  I do not know

1.8. Frequency of intake of sugary substances plays a more important role than the total amount of consumption of sugar in caries development.

Yes  No  I do not know

1.9. Irrigation of teeth with copious water after tooth brushing can effectively prevent caries.

Yes                       No                       I do not know

1.10. Consumption of xylitol in the form of chewing gum or snacks can decrease dental caries.

Yes                       No                       I do not know

1.11. Bottle-feeding can cause early childhood caries..

Yes                       No                       I do not know

1.12. Carious primary teeth need to be restored.

Yes                       No                       I do not know

1.13 Children with systematic diseases need to receive fluoride supplements.

Yes                       No                       I do not know

1.14 Children with systematic diseases should visit the dentist at least twice a year.

Yes                       No                       I do not know

The following items can cause dental caries.

| Item             | Yes | No | I do not know |
|------------------|-----|----|---------------|
| 1.15 Candy       |     |    |               |
| 1.16 Fruit juice |     |    |               |
| 1.17 Cola        |     |    |               |
| 1.18 Cheese      |     |    |               |
| 1.19 Tea         |     |    |               |

**Attitude questions:**

2.1. It is important for parents to clean children's teeth.

Strongly agree       Agree       Neither agree nor disagree   
Disagree       Strongly disagree

2.2. Primary teeth do not need much care because they eventually fall anyway.

Strongly agree       Agree       Neither agree nor disagree   
Disagree       Strongly disagree

2.3. I believe that dental problems can lead to child's general health problems.

Strongly agree       Agree       Neither agree nor disagree   
Disagree       Strongly disagree

2.4. Tooth decay in children is preventable.

Strongly agree       Agree       Neither agree nor disagree   
Disagree       Strongly disagree

2.5. Regular dental visits are important to prevent oral diseases.

Strongly agree       Agree       Neither agree nor disagree   
Disagree       Strongly disagree

2.6. Children with systematic diseases have a higher risk for tooth decay and oral diseases.

Strongly agree       Agree       Neither agree nor disagree   
Disagree       Strongly disagree

**Mother's practice concerning child's oral health questions:**

3.1. Who brushes the teeth of your child?

- He/she does not brush yet
- Himself/ Herself
- My other child
- Himself/ Herself under the supervision of adults
- Adults

3.2. How often does your child brush his/her teeth?

- Irregularly or never
- Once a week
- Several times (2-3 times) a week
- Once a day
- More than once a day

3.3. How often do you take your child to the dentist?

- When a problem occurs
- Once every six months to a year
- Irregularly
- etc.

3.4. Does your child rinse his/her mouth after eating sugary foods?

- Always
- Most of the time
- Occasionally
- Never

3.5. How often does your child have a sweet snack or sweet drink (warm or cold)?

- Three times or more per day

- Around 2 times per day
- Once a day
- Occasionally, not everyday
- Rarely

3.6. Do you use fluoridated toothpaste when brushing your child's teeth?

- Always
- Most of the time
- Occasionally
- Never
- I do not know

3.7. Does the child sleep with a bottle (other than a glass containing water) or a breast in the mouth during sleep?

- With breast
- With bottle
- With both
- Neither

3.8. If the child wakes up in the middle of the night, what do you usually do to make her/ him sleep?

- Breast feeding
- Milk bottle
- A sweet liquid bottle
- Water bottle
- Without feeding
- Other behaviors such as calming her/ him down and walking or...

3.9.How many times a year does your child use fluoride supplements such as fluoride varnish?

- More than 4 times
- 4 times
- 3 times
- Less than twice
- Does not use

**Mother's practice concerning personal oral health questions:**

4.1.How often do you brush your teeth?

- Irregularly or never
- Once a week
- Several times (2-3 times) a week
- Once a day
- More than once a day

4.2.How often do you use dental floss?

- Never
- Occasionally
- Several times (2-3 times) a week
- Once a day
- More than once a day

4.3.Do you use fluoridated toothpaste when brushing your teeth?

- Always
- Most of the time

Occasionally

Never

4.4. How often do you have a sweet snack or sweet drink (warm or cold)?

Three times or more per day

Around 2 times per day

Once a day

Occasionally, not everyday

Rarely

4.5. When was your last dental visit?

Over the past six months

Six months to a year ago

A year or two ago

Two to five years ago

More than five years ago

Never

I do not remember

**Motivation questions:**

**Answer on a scale of 0 to 10:**

1. How interested are you that your child does not have dental problems?
2. How confident are you that you can improve your child's oral health?

**Demographic questions:**

Phone number:

Gender of the child?

Boy       Girl

Age of the child?

Level of education of mother?

- Illiterate
- Below high school diploma
- High school
- High school diploma
- College degree
- Bachelor's degree
- Master's degree
- Doctorate degree

Socioeconomic status of the family?

- Poor
- Moderate
- Good
- Excellent



**Oral examination:**

Scoring of PI was as follow:

- Score of 0: absence of dental plaque;
- Score 1: presence of plaque in gingival margin which cannot be seen with the unaided eye;
- Score 2: a moderate amount of soft deposits in the gingival margin that can be seen with the unaided eye;
- Score 3: the presence of soft materials in the gingival margin or tooth and gingival edge.

The mean plaque of all teeth for each child was sum up as well (ranging from 0 to 3).

|   |   |          |   |   |
|---|---|----------|---|---|
| E | B | maxilla  | D |   |
|   |   |          |   |   |
|   | D | mandible | B | E |
|   |   |          |   |   |
